# Supplementary material for: De-repression of CSP-1 activates adaptive responses to antifungal azoles
Source: PubMed Central journal article supplement (PMC4726075; doi:10.1038/srep19447), 2016-01-19
Supplement: srep19447-s1.pdf [file srep19447-s1.pdf]

## **Supplemental Information for**

### **De-repression of CSP-1 activates adaptive responses to antifungal azoles**

Xi Chen, Wei Xue, Jun Zhou, Zhenying Zhang, Shiping Wei, Xingyu Liu, Xianyun

Sun, Wenzhao Wang, Shaojie Li\*

#### **Contents:**

**- Supplemental Figures S1 and S2**

**- Supplemental Table S2, and S3 (Supplemental Table S1 was attached in Excel)**

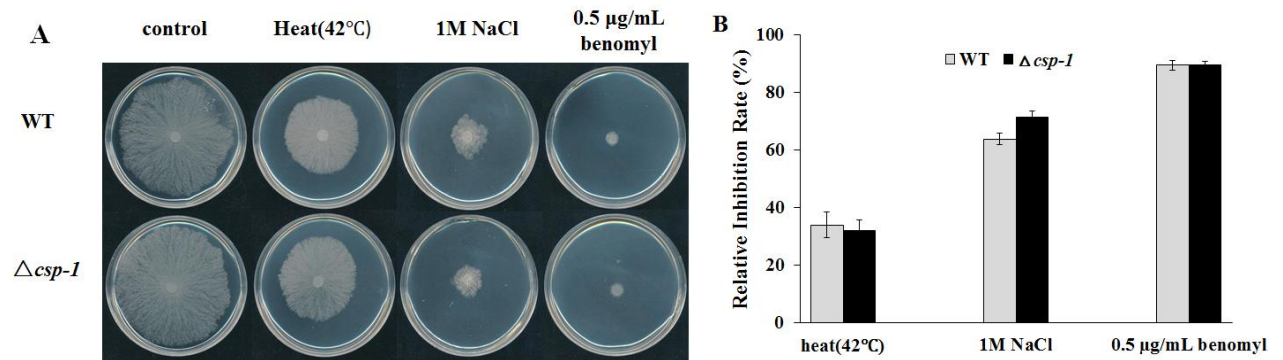

**Figure S1 Effects of *csp-1* deletion in stress sensitivities.** (A) Colony growth on plates with or without other stresses. Wild type (WT) and the *csp-1* deletion mutant ( $\Delta csp-1$ ) were inoculated under condition described in Materials and Methods. Mycelial plugs were incubated at 28 °C in dark. Images of colonies were captured after 24 h. (B) Relative growth inhibition rates by stresses. Relative growth inhibition rates were calculated based on diameters of colonies. Values of three replicates were used for statistic analysis. Means of inhibition rates were shown and standard deviations were marked with bars.  $p_{\text{heat}}=0.5879$ ,  $n=3$ ;  $p_{\text{NaCl}}=0.0145$ ,  $n=3$ ;  $p_{\text{benomyl}}=0.9576$ ,  $n=3$ .

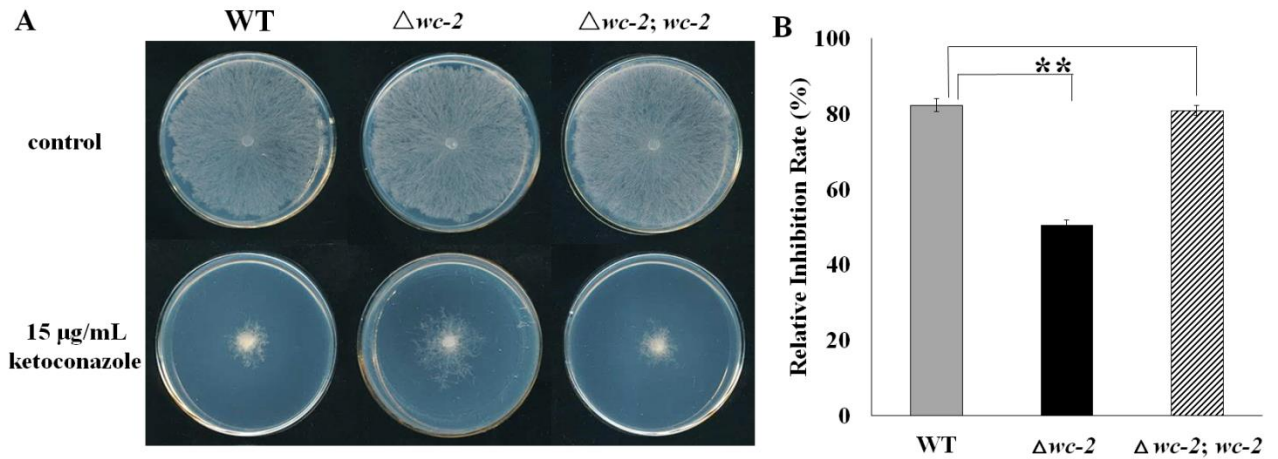

**Figure S2 Effects of *wc-2* deletion on azole sensitivity.** (A) Azole sensitivity test. The mycelial plugs of WT,  $\Delta wc-2$  and  $\Delta wc-2; wc-2$  were inoculated on plates with or without azoles and incubated at 28 °C in dark. Images of colonies were captured after 24 h. (B) Relative growth inhibition rates. Relative growth inhibition rates were calculated based on diameters of colonies. Values of three replicates were used for statistic analysis. Means of inhibition rates were shown and standard deviations were marked with bars.  $p_{\Delta wc-2} = 0.00002$ ,  $n=3$ ;  $p_{\Delta wc-2; wc-2} = 0.3091$ ,  $n=3$ .

**Table S2: Transcriptional responses by azole-responsive genes to *csp-1* deletion.**

| Gene          | Control   |                | Ketoconazole-treated |                   |
|---------------|-----------|----------------|----------------------|-------------------|
|               | WT        | $\Delta csp-1$ | WT-K                 | $\Delta csp-1$ -K |
| <i>erg2</i>   | 1.00±0.00 | 1.58±0.04**    | 4.68±0.31            | 5.67±0.09*        |
| <i>erg5</i>   | 1.00±0.00 | 1.21±0.10      | 3.50±0.23            | 4.62±0.18**       |
| <i>erg11</i>  | 1.00±0.00 | 1.33±0.28      | 12.82±0.61           | 18.48±0.62**      |
| <i>cdr4</i>   | 1.00±0.00 | 1.16±0.12      | 8.57±0.19            | 16.09±0.30**      |
| <i>ads-1</i>  | 1.00±0.00 | 1.70±0.13*     | 4.62±0.09            | 7.82±0.85*        |
| <i>stk-17</i> | 1.00±0.00 | 1.07±0.03*     | 1.99±0.13            | 4.63±0.52**       |

Note: WT: wild-type strain;  $\Delta csp-1$ : *csp-1* deletion strain; Transcript levels were

calculated relative to those for the wild-type strain without KTC treatment. Significances

between mutant and WT were estimated by the T-test, strains with extreme significant

difference ( $P < 0.01$ ) were marked with \*\*, strain with significant difference

( $0.01 < P < 0.05$ ) were marked with \*, strains without significant differences were not

marked.

**Table S3: Transcriptional responses by azole-responsive genes to *csp-1* overexpression.**

| Gene          | Control   |                            | Ketoconazole-treated |                               |
|---------------|-----------|----------------------------|----------------------|-------------------------------|
|               | WT        | <i>csp-1</i> <sup>OE</sup> | WT-K                 | <i>csp-1</i> <sup>OE</sup> -K |
| <i>erg2</i>   | 1.00±0.00 | 0.61±0.01**                | 3.99±0.11            | 1.41±0.09**                   |
| <i>erg5</i>   | 1.00±0.00 | 1.25±0.16                  | 5.04±0.46            | 3.19±0.20*                    |
| <i>erg11</i>  | 1.00±0.00 | 1.15±0.06*                 | 13.39±0.22           | 9.46±0.75**                   |
| <i>cdr4</i>   | 1.00±0.00 | 1.25±0.15                  | 15.90±2.20           | 4.21±0.16*                    |
| <i>ads-1</i>  | 1.00±0.00 | 1.55±0.15*                 | 11.80±0.94           | 4.14±0.13**                   |
| <i>stk-17</i> | 1.00±0.00 | 1.04±0.06                  | 5.35±0.15            | 0.85±0.05**                   |

Note: WT: wild-type strain; *csp-1*<sup>OE</sup>: *csp-1* overexpression strain; Transcript levels were calculated relative to those for the wild-type strain without KTC treatment. Significances between *csp-1*<sup>OE</sup> and WT were estimated by the T-test, strains with extreme significant difference (P<0.01) were marked with \*\*, strain with significant difference (0.01<P<0.05) were marked with \*, strains without significant differences were not marked.
